# Supplementary material for: Pembrolizumab plus pemetrexed-carboplatin combination in first-line treatment of advanced non-squamous non-small cell lung cancer: a multicenter real-life study (CAP29)
Source: PubMed Central journal article supplement — Transl Lung Cancer Res. 2023 Feb 23;12(2):266–76. doi: 10.21037/tlcr-22-556 (PMC9989798; doi:10.21037/tlcr-22-556), 2023-02-23
Supplement: tlcr-12-02-266-supplementary.pdf [file tlcr-12-02-266-supplementary.pdf]

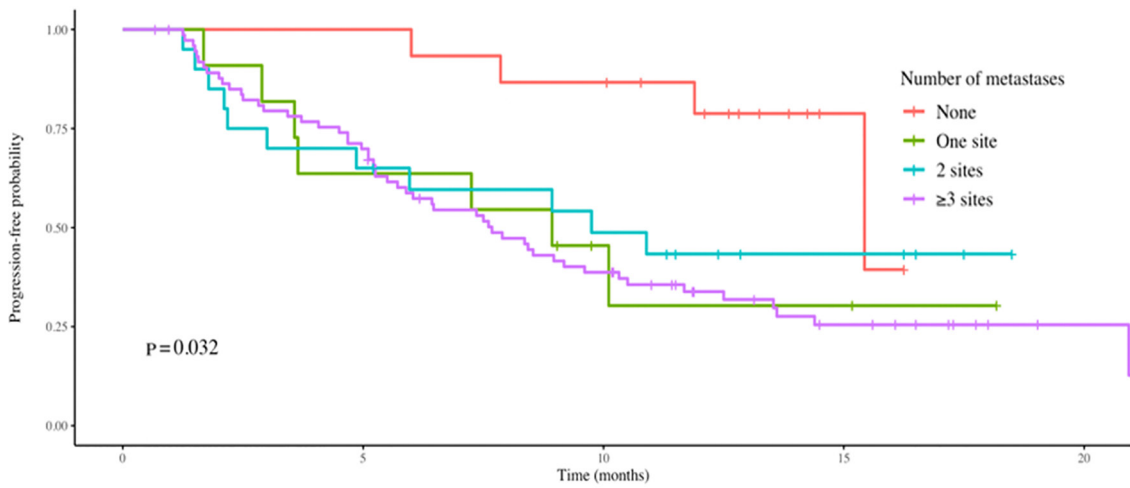

**Figure S1** Progression-free survival of patients with advanced non-squamous NSCLC treated with the association of pembrolizumab plus chemotherapy, according to the number of metastatic site. NSCLC, non-small cell lung cancer.

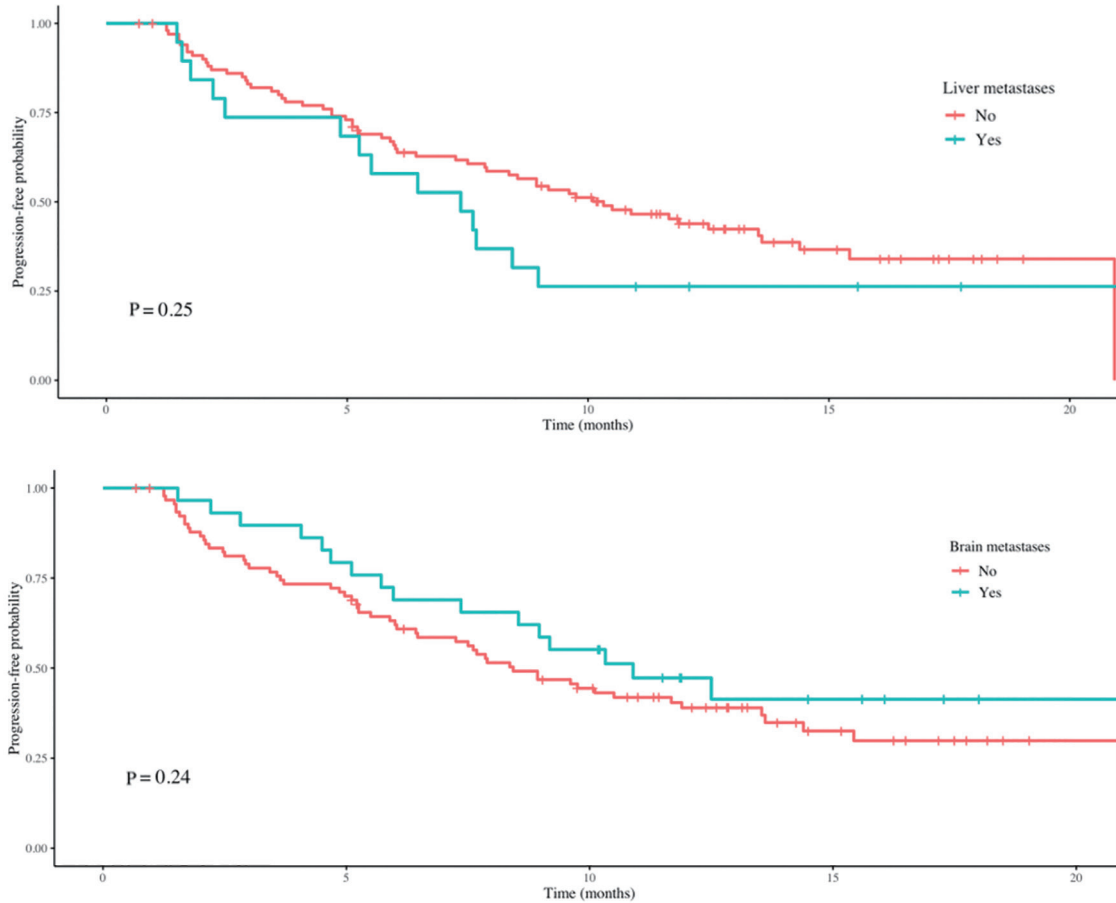

**Figure S2** Progression-free survival of patients with advanced non-squamous NSCLC treated with the association of pembrolizumab plus chemotherapy and considered as “challenging subgroups” (A: presence of liver metastases; B: presence of brain metastases). NSCLC, non-small cell lung cancer.

**Table S1** Time and courses of the combination treatment

|                                                         | N=121 |
|---------------------------------------------------------|-------|
| No of carboplatin cures                                 | 3.6   |
| No of pemetrexed cures                                  | 6.7   |
| No of pembrolizumab cures                               | 10.8  |
| Median duration of treatment with pemetrexed (weeks)    | 19.4  |
| Median duration of treatment with carboplatin (weeks)   | 10.3  |
| Median duration of treatment with pembrolizumab (weeks) | 22.0  |
